# Supplementary material
Source: Springer Nature journal article supplement (https://www.springermedizin.de/resource/supplementary/12889_2011_3646_MOESM2_ESM.pdf/9489532)

**Jan 23: M/19/S/J/SZ** —

**Mar 11: M/20+/S/J/SZ** —

**Mar 29: M/23/S/J/SZ** —

**Apr 07: F/18/S/J/SZ** ==

**May 06: M/24/S/J/SZ** —

**May 14: M/21/S/J/SZ** ==

**May 25: M/19/S/J/SZ** ==

**May 27: M/25/A/C/SZ** —

**Jul 17: F/25/A/J/HC** ==

**Aug 04: F/22/S/J/KS** —

**Sep 10: F/25/A/J/HC** —

**Nov 05: M/23/S/J/SZ** —

**Mar 17: F/17/A/J/SZ**

**Apr 06: F/18/A/J/SZ**

**May 11: F/24/S/J/SZ**

**May 21: M/21/S/J/SZ**

**May 26: M/23/S/J/SZ**

**Jul 20: M/18/S/J/FS**

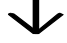

Supplement: MOESM2 [file 9489532]
